# Supplementary material for: Early extracellular matrix changes are associated with later development of bronchiolitis obliterans syndrome after lung transplantation
Source: PubMed Central journal article supplement — BMJ Open Respir Res. 2017 Apr 12;4(1):e000177. doi: 10.1136/bmjresp-2016-000177 (PMC5411729; doi:10.1136/bmjresp-2016-000177), 2017-04-12
Supplement: bmjresp-2016-000177supp_figures.pdf [file bmjresp-2016-000177supp_figures.pdf]

**Supplementary figure S1: Distribution of BOS onset and max. BOS grades in the study population**

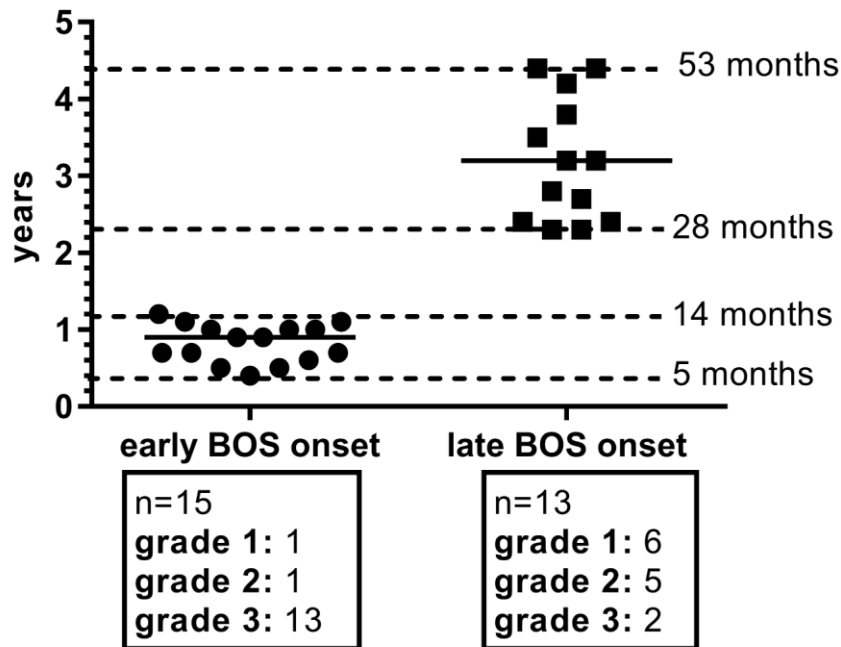

Patients developed BOS early ( $\leq 1.2$  years) or late ( $\geq 2.3$  years). More early-onset patients developed BOS grade 3 compared to late-onset patients, within the 5-years follow-up.

**Supplementary figure S2: General distribution of total collagen and col IV/biglycan**

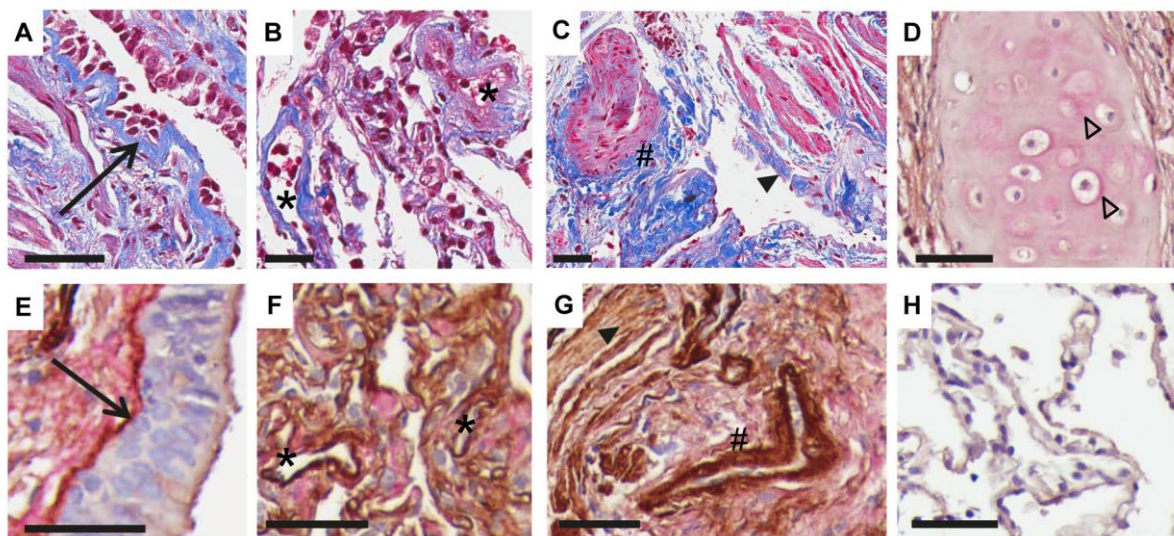

Staining of total collagen in subepithelial structures of airways, especially in the (A) BM (→), in the adventitia of (B) small (\*) and (C) large vessels (#) and in (C) streaks of interstitial ECM (▶) (D) Pericellular biglycan staining in cartilage confirming known localization and antibody specificity (Δ). Staining of Col IV in the BM of (E) airways (→), (F) alveoli and small vessels (\*), (G) muscles (▶) and smooth muscle layers of larger vessels (#). The same pictures visualize biglycan staining (E) close or below the airway BM (→), (F) in the adventitia of small (\*) and (G) larger vessels (#), and (F) patchy in alveolar septa. (H) Total absence of immunoreactivity when omitting the primary antibodies.

Scale bar=50μm, Masson's Trichrome total collagen=blue, IHC col IV= brown, IHC biglycan=red.

**Supplementary figure S3A: Representative pictures of Masson's Trichrome staining (alveoli)**

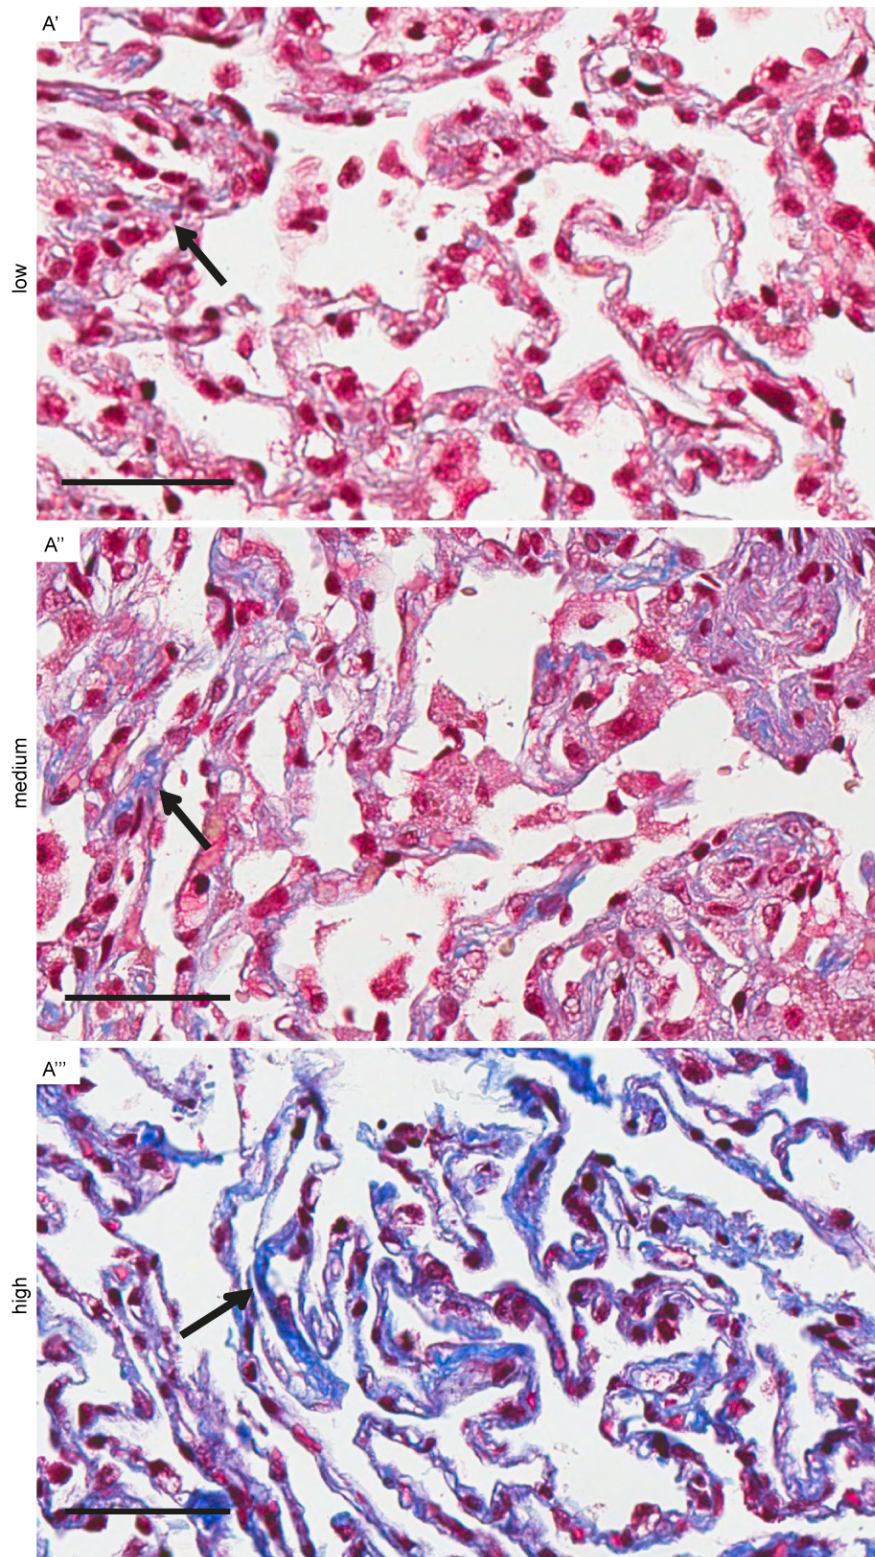

Exemplary pictures depict staining for total collagen (→) in the alveolar septa in (A') patchy, small isolated areas, (A'') patchy, larger streaks and (A''') continuous, intensely stained streaks.

Scale bar=50μm, Masson's Trichrome total collagen=blue

**Supplementary figure S3B: Representative pictures of col IV/biglyan IHC (alveoli)**

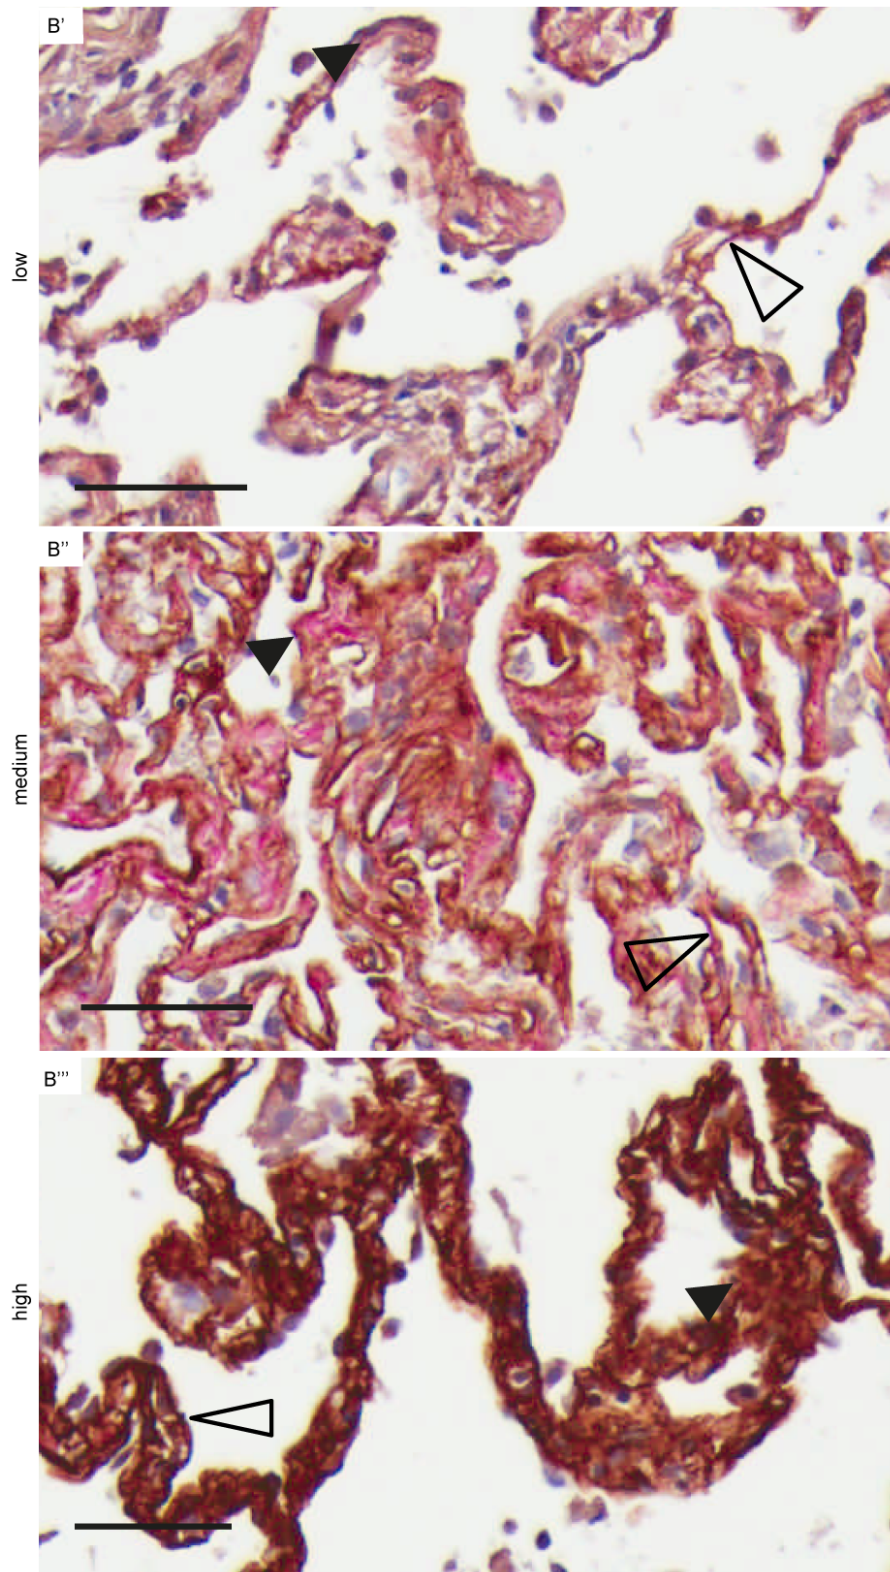

IHC staining for collagen type IV ( $\Delta$ ) varied between (B') low intensity staining in a thin line in the alveolar BM, (B'') intense, distinct staining in the alveolar BM and (B''') very strong staining. In the same pictures one can identify biglycan staining ( $\blacktriangleright$ ) with (B') low intensity staining in the alveolar parenchyma and (B'') patchy areas of intense staining.

**Supplementary figure S3C: Representative pictures of col IV/biglycan IHC (small airways)**

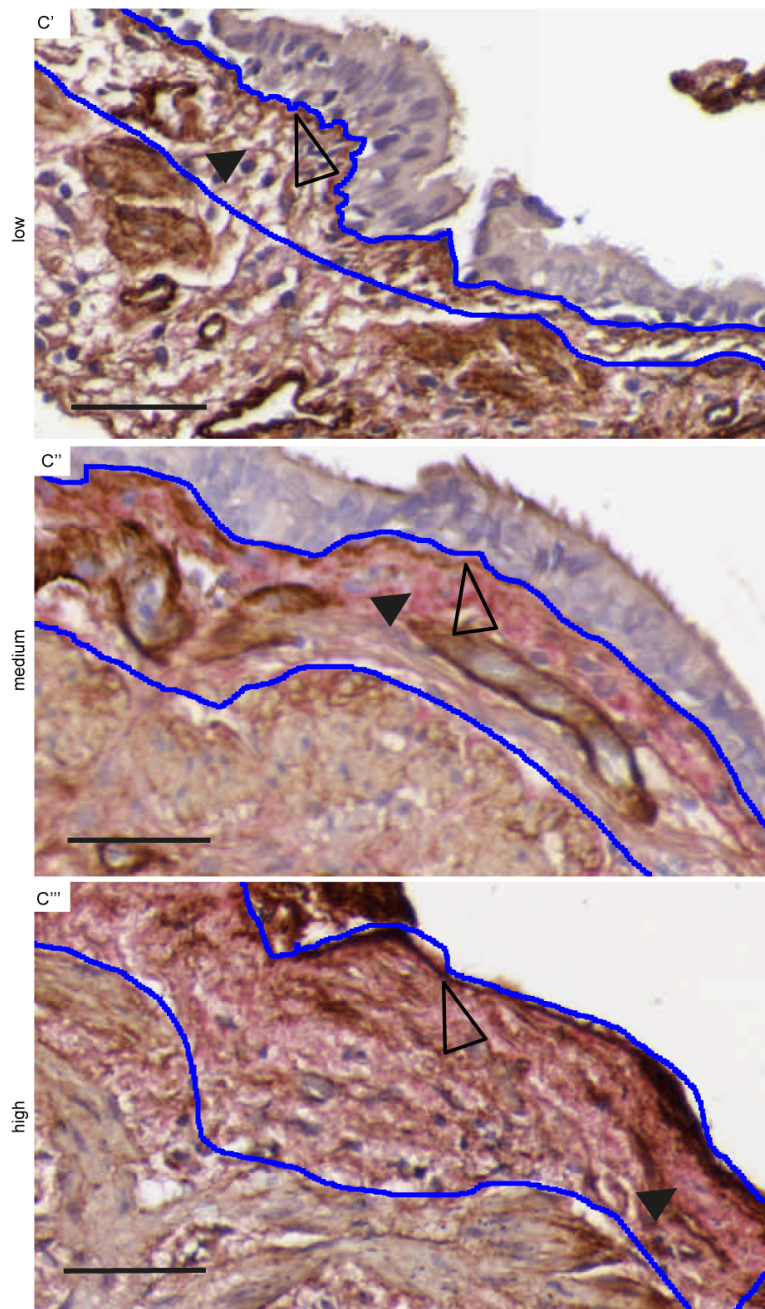

IHC staining for collagen type IV ( $\Delta$ ) varied between (B') low intensity staining in a thin line in the small airway BM and capillary BM, (B'') more intense staining and (B''') very strong staining. In the same pictures one can identify biglycan staining ( $\blacktriangleright$ ) with (B') very low intensity staining in the small airway submucosa, (B'') more intense staining in parts of the submucosa and (B''') staining throughout the submucosa.
